# Supplementary material for: Importance of the forest state in estimating biomass losses from tropical forests: combining dynamic forest models and remote sensing
Source: Copernicus journal article supplement (doi:10.5194/bg-19-1891-2022), 2022-04-05
Supplement: Supplementary file 2 [file bg-19-1891-2022-supplement.zip]

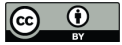

## *Supplement of*

# **Importance of the forest state in estimating biomass losses from tropical forests: combining dynamic forest models and remote sensing**

**Ulrike Hiltner et al.**

*Correspondence to:* Ulrike Hiltner (u.hiltner.uh@gmail.com)

- bg-19-1891-2022-supplement-title-page.pdf
- bg-2021-195-supplement-version6\_uh
  - HiltnerEtAl\_Supplements.pdf
  - data
    - \* mapAllRasStack2000m\_R4.tif
    - \* simResults\_Formind.txt

The copyright of individual parts of the supplement might differ from the article licence.
